# Supplementary material for: Global Patterns of Earwig Species Richness
Source: MDPI journal article supplement (doi:10.3390/d14100890), 2022-10-21
Supplement: s1 [file s1]

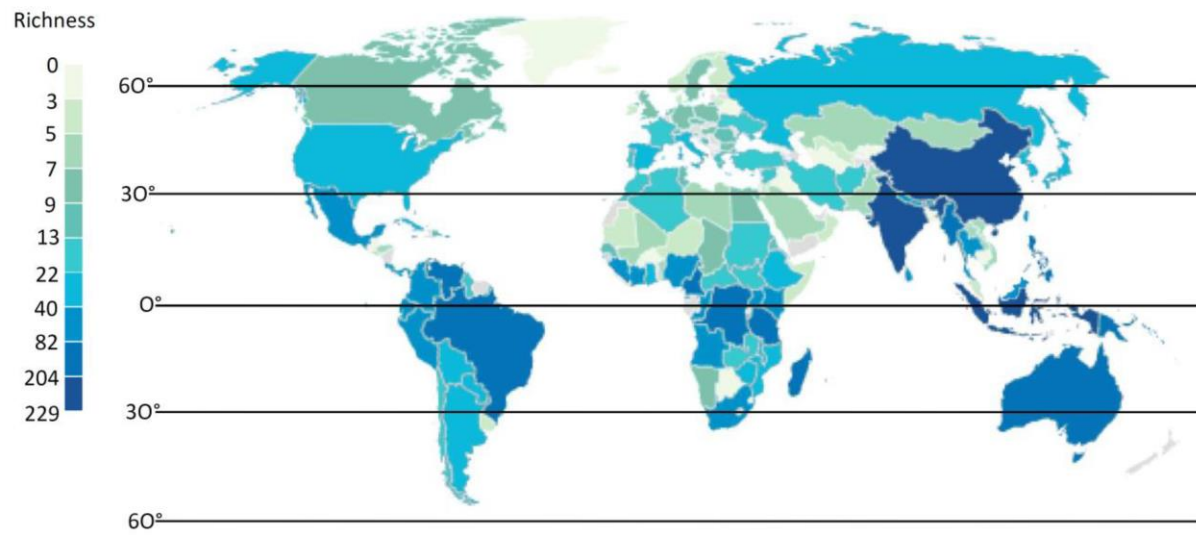

**Figure S1.** Global pattern of earwig species richness by country.

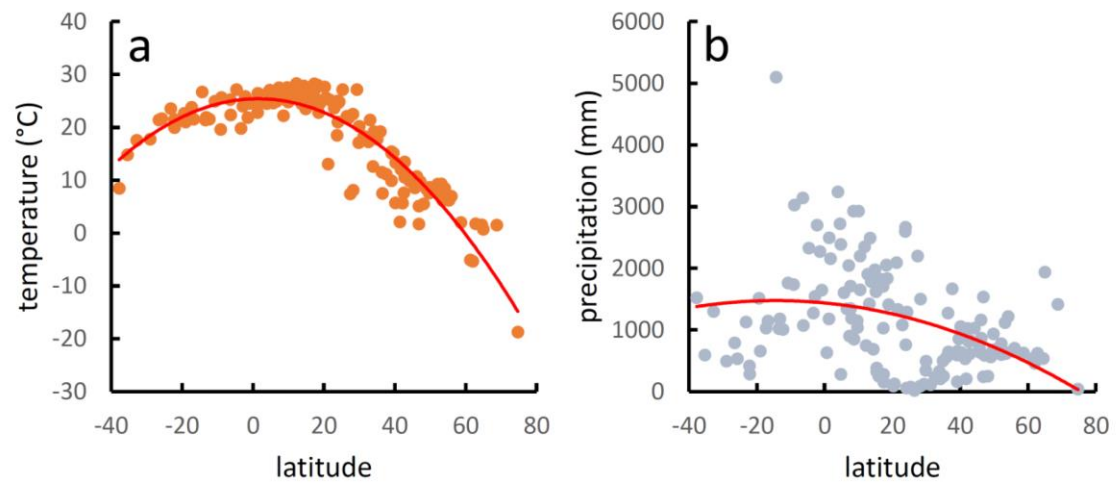

**Figure S2.** Latitudinal patterns of variation in average annual temperature (a) and precipitation (b) by country. Regression equations are given in Table S2.

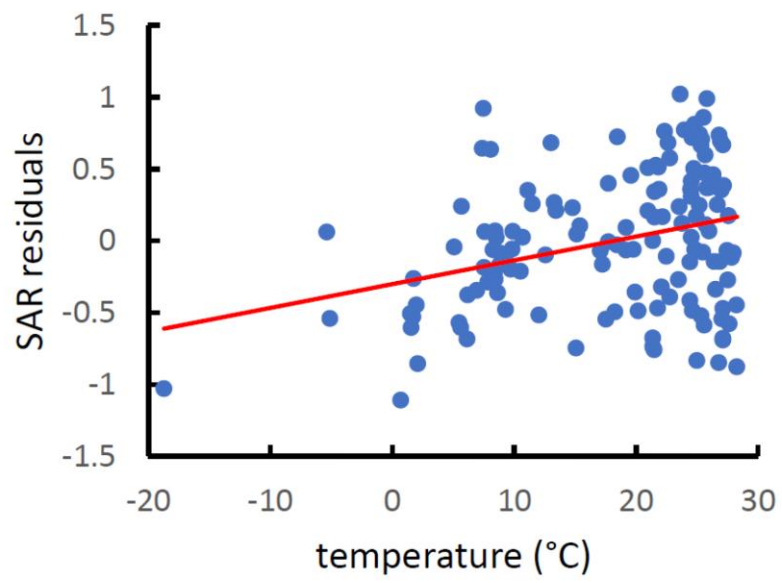

**Figure S3.** Relationship between earwig diversity and average annual temperature at global level. Regression equation is given in Table S2.

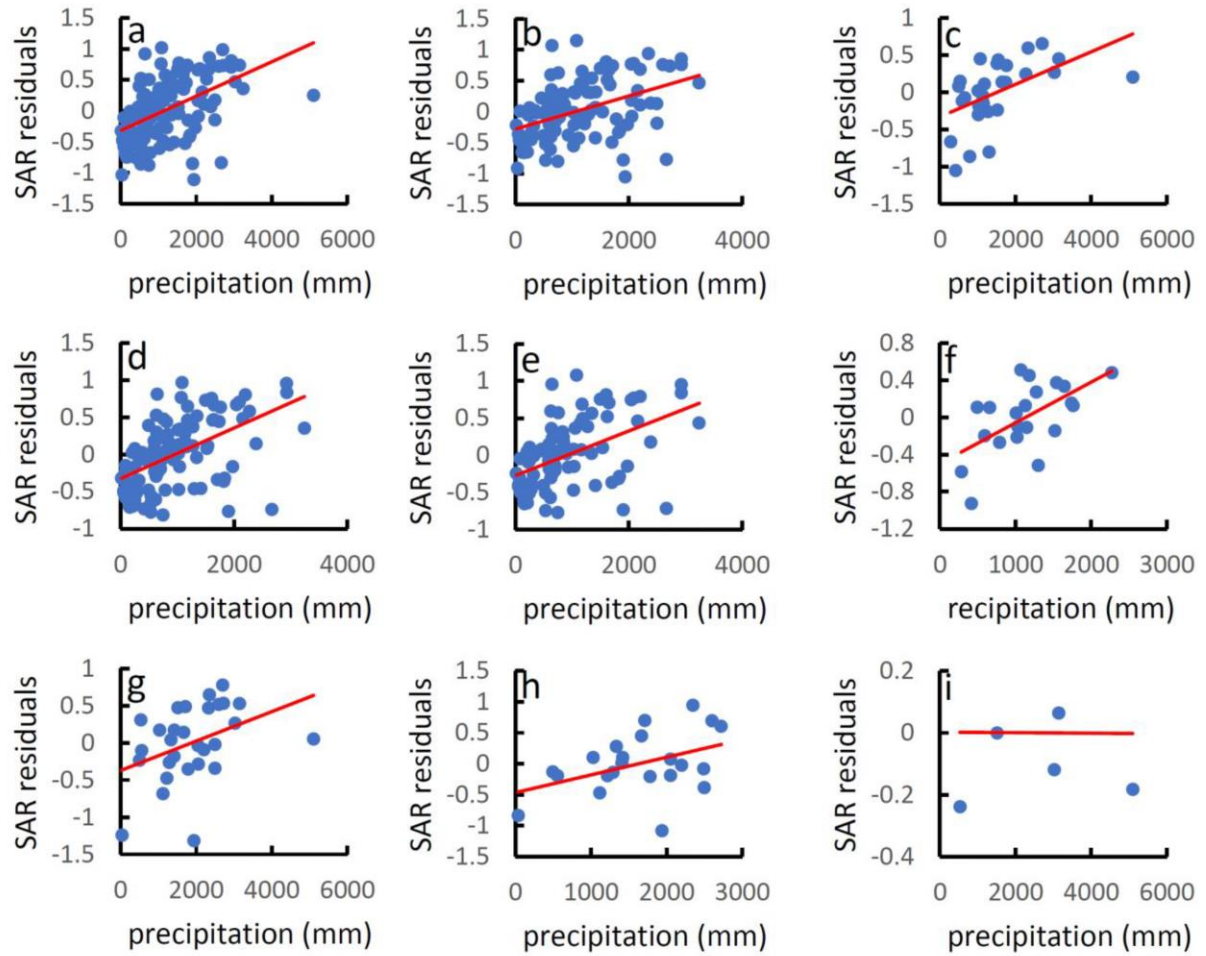

**Figure S4.** Relationships between earwig diversity and precipitation. (a) Global pattern for mainland and island countries; (b) mainland and island countries in the Northern Hemisphere; (c) mainland and island countries in the Southern Hemisphere; (d) global pattern for mainland countries; (e) mainland countries in the Northern Hemisphere; (f) mainland countries in the Southern Hemisphere; (g) global pattern for island countries; (h) island countries in the Northern Hemisphere; (i) island countries in the Southern Hemisphere. Regression equations are given in Table S2.
