# Supplementary material for: Global Patterns of Earwig Species Richness
Source: MDPI journal article supplement (doi:10.3390/d14100890), 2022-10-21
Supplement: s1 [file s1]

**Table S2.** Latitudinal patterns of variation of average annual temperature and precipitation (second-order polynomial regressions), and relationships between earwig diversity (residuals from the species–area relationships; Tables 1-3) and precipitation (linear regressions).  $r^2$  = coefficient of determination, F = Fisher’s F, p = probability.

| Model                                                                                       | Equation                           | $r^2$                 | F       | p                      |
|---------------------------------------------------------------------------------------------|------------------------------------|-----------------------|---------|------------------------|
| Global relationship between temperature and latitude                                        | $y = 25.390 - 0.008x^2 + 0.022x$   | 0.839                 | 359.380 | $1.93 \times 10^{-55}$ |
| Global relationship between rainfall and latitude                                           | $y = 1437.900 - 0.181x^2 - 5.275x$ | 0.144                 | 11.557  | $2.29 \times 10^{-5}$  |
| Global relationship between temperature and diversity (mainlands and islands)               | $y = -0.301 + 0.017x$              | 0.097                 | 14.872  | 0.0002                 |
| Global relationship between rainfall and diversity (mainlands and islands)                  | $y = -0.317 + 0.0003x$             | 0.241                 | 44.057  | $6.60 \times 10^{-10}$ |
| Relationship between rainfall and diversity in the North Hemisphere (mainlands and islands) | $y = -0.282 + 0.0003x$             | 0.200                 | 27.792  | $6.74 \times 10^{-7}$  |
| Relationship between rainfall and diversity in the South Hemisphere (mainlands and islands) | $y = -0.330 + 0.0002x$             | 0.268                 | 9.516   | 0.005                  |
| Global relationship between rainfall and diversity (mainlands)                              | $y = -0.324 + 0.0003x$             | 0.270                 | 40.727  | $4.27 \times 10^{-9}$  |
| Relationship between rainfall and diversity in the North Hemisphere (mainlands)             | $y = -0.274 + 0.0003x$             | 0.233                 | 27.00   | $1.28 \times 10^{-6}$  |
| Relationship between rainfall and diversity in the South Hemisphere (mainlands)             | $y = -0.499 + 0.0004x$             | 0.348                 | 10.128  | 0.005                  |
| Global relationship between rainfall and diversity (islands)                                | $y = -0.372 + 0.0002x$             | 0.154                 | 4.924   | 0.035                  |
| Relationship between rainfall and diversity in the North Hemisphere (islands)               | $y = -0.468 + 0.0003x$             | 0.181                 | 4.417   | 0.049                  |
| Relationship between rainfall and diversity in the South Hemisphere (islands)               | $y = 0.002 - 6 \times 10^{-7}x$    | $2.10 \times 10^{-5}$ | 0.0001  | 0.992                  |
